# Supplementary material
Source: HighWire-hosted journal article supplement (https://emj.bmj.com/content/38/5/366)
Supplement: inline-supplementary-material-1 [file inline-supplementary-material-1.pdf]

Supplementary information.

Protocol for SARS-CoV-2 combined nose and throat swab rtPCR testing during study period.

Any ONE of Clinical or Radiological Evidence of Pneumonia or ARDS

or

Fever > 37.8°C AND ACUTE ONSET of at least one of the following symptoms.

- Persistent cough
- Hoarseness
- Nasal Discharge/Congestion
- Shortness of Breath
- Sore Throat
- Wheezing
- Sneezing
- RR > 20 or Sats < 95% if patient unable to provide history.
